# Supplementary material for: Metabolic Alteration of Trypanosoma cruzi during Differentiation of Epimastigote to Trypomastigote Forms
Source: MDPI journal article supplement (doi:10.3390/pathogens11020268), 2022-02-19

**Supplementary Table S1** - Concentration of organic acids in different times of the differentiation of the *Trypanosoma cruzi* in TAU3AAG medium, obtained through the Aminex HPX 87H column.

| Organic acids | 24 h            | 48 h           | 72 h           |
|---------------|-----------------|----------------|----------------|
| Glycerate-2-P | 1890.02 ± 132.1 | 1547.12 ± 82.5 | 811.62 ± 38.76 |
| Citrate       | 24.12 ± 1.51    | 31.08 ± 1.77   | 8.89 ± 4.34    |
| Piruvate      | 357.04 ± 17.7   | 206.23 ± 14.5  | 10.12 ± 8.43   |
| Malate        | 10.01 ± 0.54    | 27.02 ± 2.65   | 20.43 ± 7.12   |
| Succinate     | 27.30 ± 1.91    | 226.12 ± 13.61 | 199.66 ± 8.34  |
| Acetate       | 381.43 ± 29.35  | 342.03 ± 21.44 | 259.24 ± 23.45 |

The values corresponds the media ± SD of the concentration in nmoles of organic acid of three experiments realized with a population of  $\sim 3 \times 10^8$  parasites.

**Supplementary Table S2** - Concentration of the acids organic during the growth of the *Trypanosoma cruzi* in BHI medium, obtained through the Aminex HPX 87H column.

| Organic Acid  | 24 h          | 72 h          | 12h            | 168 h           |
|---------------|---------------|---------------|----------------|-----------------|
| Glycerate-2-P | 1695.5 ± 92.2 | 1569.3 ± 6.31 | 1809.2 ± 93.62 | 1484.2 ± 121.11 |
| Citrate       | 129.3 ± 9.11  | 169.2 ± 9.46  | 326.4 ± 11.31  | 281.3 ± 28.01   |
| Piruvate      | 2.4 ± 0.11    | 1.7 ± 0.03    | 2.7 ± 0.80     | 4.7 ± 1.10      |
| Malate        | 2.6 ± 0.12    | 2.7 ± 0.11    | 0.7 ± 0.05     | 0.6 ± 0.03      |
| Succinate     | 2.2 ± 0.07    | 3.5 ± 0.15    | 4.2 ± 0.41     | 2.9 ± 0.08      |
| Acetate       | 59.1 ± 3.13   | 102.2 ± 3.78  | 185.5 ± 12.21  | 147.2 ± 7.60    |

The values correspond the media ± SD of the concentration in nmoles of organic acid of three experiments realized with a population of  $\sim 3 \times 10^8$  parasites.

**Supplementary Table S3-** Correlation between the percentage of epimastigote and tripomastigote forms and the specific enzymatic activity of aldolase (Ald), hexokinase (Hk) and piruvate kinase (Pk) enzymes during the differentiation of the *T. cruzi* in TAU3AAG medium.

| Time (h) | % trypo | % epi | Specific Activity |             |             |
|----------|---------|-------|-------------------|-------------|-------------|
|          |         |       | Pk                | Hk          | Ald         |
| 0        | <1      | >100  | 0.11 ± 0.02       | 0.30 ± 0.00 | 4.40 ± 0.70 |
| 24       | 25      | 75    | 0.08 ± 0.01       | 0.23 ± 0.04 | 2.00 ± 0.20 |
| 48       | 50      | 50    | 0.01 ± 0.00       | 0.03 ± 0.01 | 0.34 ± 0.00 |
| 72       | 70      | 30    | 0.06 ± 0.00       | 0.11 ± 0.02 | 0.74 ± 0.02 |

The values of specific activity correspond the average with the standard deviation of three experiments accomplished in copy. The unit for Pk and Hk was  $\mu\text{moles subst/min/mg protein}$  and for the aldolase was  $\text{nmoles subst/min/mg protein}$ .  $\sim 2 \times 10^8$  parasites were used in each assay.

**Supplementary Table S4-** Specific enzymatic activity of the aldolase (Ald), hexokinase (Hk) and piruvate kinase (Pk) extracted from epimastigotes maintained in BHI medium.

| Time<br>(h) | Specific Activity |                 |                 |
|-------------|-------------------|-----------------|-----------------|
|             | Pk                | Hk              | Ald             |
| 24          | 0.02 $\pm$ 0.09   | 0.09 $\pm$ 0.03 | 3.97 $\pm$ 0.03 |
| 72          | 0.08 $\pm$ 0.03   | 0.23 $\pm$ 0.01 | 4.04 $\pm$ 0.25 |
| 120         | 0.10 $\pm$ 0.02   | 0.29 $\pm$ 0.00 | 4.05 $\pm$ 0.02 |

The values of specific activity correspond the average with the standard deviation of two experiments accomplished in copy. The unit for Pk and Hk was  $\mu$ moles subst/min/mg protein and for the aldolase was nmoles subst/min/mg protein.  $\sim 2 \times 10^8$  parasites were used in each experiment of enzymatic determination.

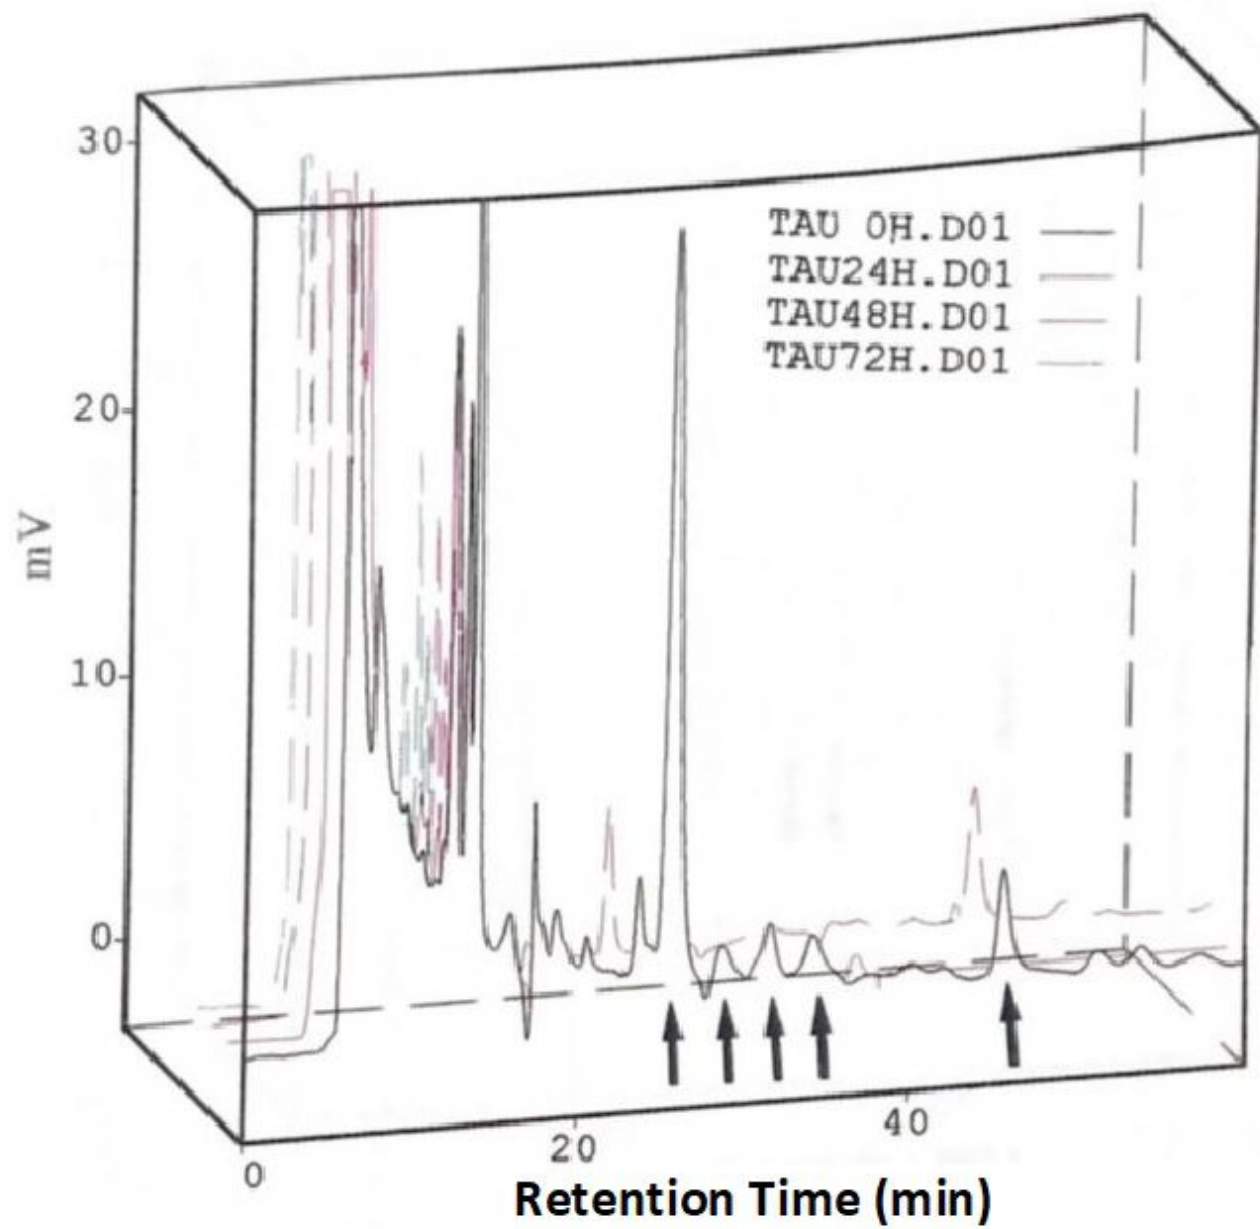

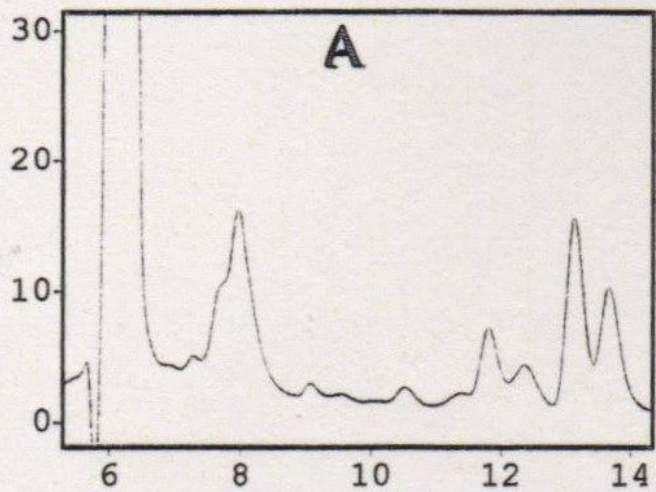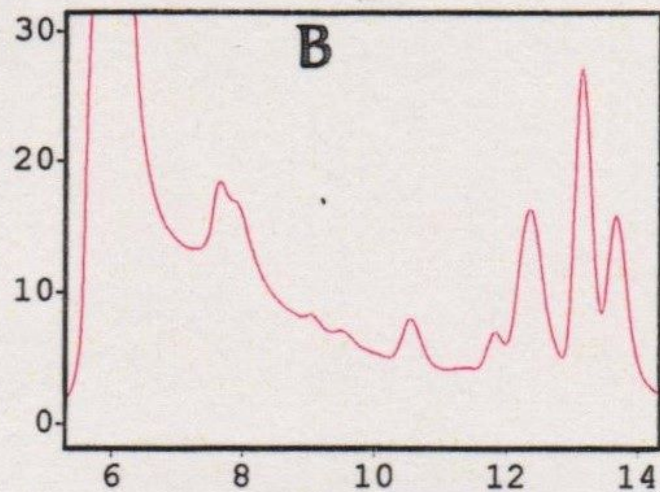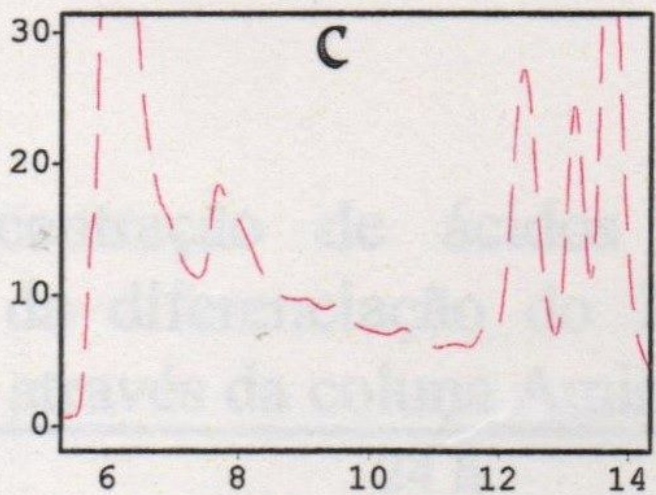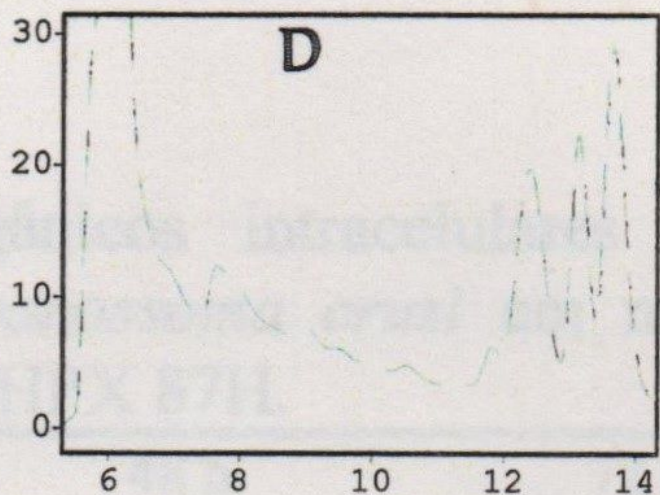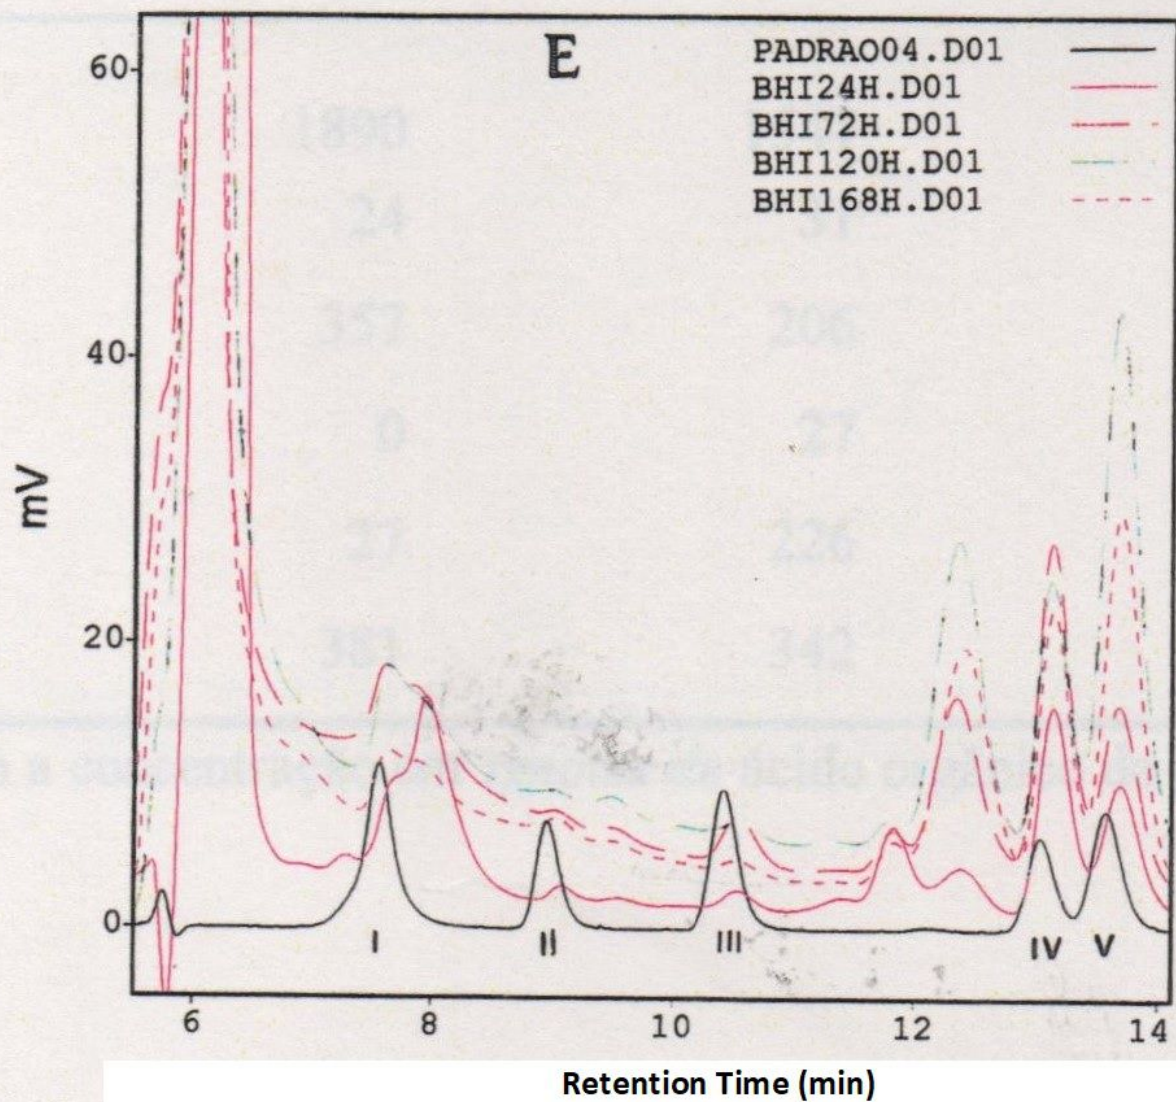

Supplement: s1 [file s1]
